# Supplementary material for: Reconstruction of phyletic trees by global alignment of multiple metabolic networks
Source: PubMed Central journal article supplement (PMC3549807; doi:10.1186/1471-2105-14-s2-s12), 2013-01-21
Supplement: 1471-2105-14-S2-S12-S1.pdf [file 1471-2105-14-S2-S12-S1.pdf]

| Code                | Organism                                                          | # of nodes | # of edges | Taxonomy            |
|---------------------|-------------------------------------------------------------------|------------|------------|---------------------|
| <b>Phylum scale</b> |                                                                   |            |            |                     |
| ape                 | <i>Aeropyrum pernix</i> K1                                        | 900        | 1429       | Crenarchaeota       |
| hal                 | <i>Halobacterium</i> sp.<br>NRC-1                                 | 1005       | 1574       | Euryarchaeota       |
| mth                 | <i>Methanothermobacter</i><br><i>thermautotrophicus</i><br>deltaH | 906        | 1500       | Euryarchaeota       |
| sso                 | <i>Sulfolobus solfataricus</i><br>P2                              | 1250       | 2172       | Crenarchaeota       |
| syn                 | <i>Synechocystis</i> sp. PCC<br>6803                              | 1424       | 2088       | Cyanobacteria       |
| tac                 | <i>Thermoplasma</i><br><i>acidophilum</i> DSM 1728                | 892        | 1334       | Euryarchaeota       |
| bha                 | <i>Bacillus halodurans</i><br>C-125                               | 1625       | 3029       | Firmicutes          |
| dra                 | <i>Deinococcus</i><br><i>radiodurans</i> R1                       | 1376       | 2226       | Deinococcus-Thermus |
| mle                 | <i>Mycobacterium leprae</i><br>TN                                 | 1090       | 1633       | Actinobacteria      |
| mtu                 | <i>Mycobacterium</i><br><i>tuberculosis</i> H37Rv                 | 1816       | 4546       | Actinobacteria      |
| bbu                 | <i>Borrelia burgdorferi</i><br>B31                                | 379        | 448        | Spirochaetes        |
| buc                 | <i>Buchnera aphidicola</i><br>APS                                 | 618        | 779        | γ-proteobacteria    |
| cpa                 | <i>Chlamydophila</i><br><i>pneumoniae</i> AR39                    | 595        | 790        | Chlamydiae          |
| cpn                 | <i>Chlamydophila</i><br><i>pneumoniae</i> CWL029                  | 596        | 792        | Chlamydiae          |
| ctr                 | <i>Chlamydia trachomatis</i><br>D/UW-3/CX                         | 584        | 776        | Chlamydiae          |
| tpa                 | <i>Treponema pallidum</i><br>subsp. <i>pallidum</i><br>Nichols    | 426        | 588        | Spirochaetes        |
| uur                 | <i>Ureaplasma parvum</i><br>serovar 3 ATCC<br>700970              | 291        | 341        | Tenericutes         |
| ccr                 | <i>Caulobacter</i><br><i>crescentus</i> CB15                      | 1665       | 3015       | α-proteobacteria    |
| cje                 | <i>Campylobacter jejuni</i><br>subsp. <i>jejuni</i> NCTC<br>11168 | 995        | 1367       | ε-proteobacteria    |
| eco                 | <i>Escherichia coli</i> K-12<br>MG1655                            | 1887       | 3180       | γ-proteobacteria    |
| ecs                 | <i>Escherichia coli</i>                                           | 1862       | 3172       | γ-proteobacteria    |

|                                          |                                         |      |      |                  |
|------------------------------------------|-----------------------------------------|------|------|------------------|
|                                          | <i>O157:H7 Str. Sakai</i>               |      |      |                  |
| hpy                                      | <i>Helicobacter pylori</i> 26695        | 889  | 1163 | ε-proteobacteria |
| mlo                                      | <i>Mesorhizobium loti</i> MAFF303099    | 2178 | 4738 | α-proteobacteria |
| nma                                      | <i>Neisseria meningitidis</i> Z2491     | 1079 | 1513 | β-proteobacteria |
| nme                                      | <i>Neisseria meningitidis</i> MC58      | 1084 | 1557 | β-proteobacteria |
| pae                                      | <i>Pseudomonas aeruginosa</i> PA01      | 2004 | 4168 | γ-proteobacteria |
| <b>Lactobacillus</b>                     |                                         |      |      |                  |
| lbh                                      | <i>Lactobacillus buchneri</i>           | 964  | 1438 | Firmicutes       |
| lbr                                      | <i>Lactobacillus brevis</i>             | 846  | 1305 | Firmicutes       |
| lfe                                      | <i>Lactobacillus fermentum</i> IFO 3956 | 921  | 1377 | Firmicutes       |
| lru                                      | <i>Lactobacillus reuteri</i> SD2112     | 863  | 1294 | Firmicutes       |
| lsn                                      | <i>Lactobacillus sanfranciscensis</i>   | 539  | 775  | Firmicutes       |
| lai                                      | <i>Lactobacillus acidophilus</i> 30SC   | 720  | 1051 | Firmicutes       |
| lay                                      | <i>Lactobacillus amylovorus</i> GRL1118 | 659  | 897  | Firmicutes       |
| lcr                                      | <i>Lactobacillus crispatus</i>          | 719  | 1071 | Firmicutes       |
| lga                                      | <i>Lactobacillus gasseri</i>            | 648  | 934  | Firmicutes       |
| lhl                                      | <i>Lactobacillus helveticus</i> H10     | 667  | 1005 | Firmicutes       |
| ljo                                      | <i>Lactobacillus johnsonii</i> NCC 533  | 670  | 982  | Firmicutes       |
| lke                                      | <i>Lactobacillus kefiranoferiens</i>    | 728  | 1107 | Firmicutes       |
| <b>Prochlorococcus and Synechococcus</b> |                                         |      |      |                  |
| pma                                      | <i>Prochlorococcus marinus</i> SS120    | 1061 | 1480 | Cyanobacteria    |
| pmc                                      | <i>Prochlorococcus marinus</i> MIT 9515 | 1030 | 1463 | Cyanobacteria    |
| pmi                                      | <i>Prochlorococcus marinus</i> MIT9312  | 1058 | 1463 | Cyanobacteria    |
| pmm                                      | <i>Prochlorococcus marinus</i> MED4     | 1052 | 1467 | Cyanobacteria    |
| pmn                                      | <i>Prochlorococcus marinus</i> NATL2A   | 1048 | 1448 | Cyanobacteria    |
| syc                                      | <i>Synechococcus elongatus</i> PCC6301  | 1233 | 1708 | Cyanobacteria    |
| syd                                      | <i>Synechococcus</i> sp. CC9605         | 1233 | 1737 | Cyanobacteria    |

|                                                           |                                                       |      |      |                             |
|-----------------------------------------------------------|-------------------------------------------------------|------|------|-----------------------------|
| sye                                                       | <i>Synechococcus</i> sp.<br>CC9902                    | 1167 | 1630 | Cyanobacteria               |
| syf                                                       | <i>Synechococcus</i><br><i>elongatus</i> PCC7942      | 1278 | 1790 | Cyanobacteria               |
| syr                                                       | <i>Synechococcus</i> sp.<br>RCC307                    | 1209 | 1696 | Cyanobacteria               |
| syw                                                       | <i>Synechococcus</i> sp.<br>WH8102                    | 1180 | 1674 | Cyanobacteria               |
| syx                                                       | <i>Synechococcus</i> sp.<br>WH7803                    | 1269 | 1762 | Cyanobacteria               |
| <b>Green sulfur bacteria and Green nonsulfur bacteria</b> |                                                       |      |      |                             |
| atm                                                       | <i>Anaerolinea</i><br><i>thermophila</i>              | 1057 | 1639 | Green nonsulfur<br>bacteria |
| cap                                                       | <i>Caldilinea aerophila</i>                           | 1409 | 2276 | Green nonsulfur<br>bacteria |
| cau                                                       | <i>Chloroflexus</i><br><i>aurantiacus</i>             | 1526 | 2474 | Green nonsulfur<br>bacteria |
| det                                                       | <i>Dehalococcoides</i><br><i>ethenogenes</i>          | 694  | 1023 | Green nonsulfur<br>bacteria |
| dly                                                       | <i>Dehalogenimonas</i><br><i>lykanthroporepellens</i> | 744  | 1048 | Green nonsulfur<br>bacteria |
| hau                                                       | <i>Herpetosiphon</i><br><i>aurantiacus</i>            | 1414 | 2347 | Green nonsulfur<br>bacteria |
| rrs                                                       | <i>Roseiflexus</i> sp. RS-1                           | 1532 | 2529 | Green nonsulfur<br>bacteria |
| sti                                                       | <i>Sphaerobacter</i><br><i>thermophilus</i>           | 1377 | 2340 | Green nonsulfur<br>bacteria |
| tro                                                       | <i>Thermomicrobium</i><br><i>roseum</i>               | 1251 | 2084 | Green nonsulfur<br>bacteria |
| cch                                                       | <i>Chlorobium</i><br><i>chlorochromatii</i>           | 1073 | 1547 | Green sulfur bacteria       |
| cte                                                       | <i>Chlorobaculum</i><br><i>tepidum</i>                | 1089 | 1520 | Green sulfur bacteria       |
| cts                                                       | <i>Chloroherpeton</i><br><i>thalassium</i>            | 1143 | 1714 | Green sulfur bacteria       |
| paa                                                       | <i>Prosthecochloris</i><br><i>aestuarii</i>           | 1139 | 1655 | Green sulfur bacteria       |
| plt                                                       | <i>Pelodictyon luteolum</i>                           | 1043 | 1485 | Green sulfur bacteria       |
